# Supplementary material
Source: HighWire-hosted journal article supplement (https://www.cmaj.ca/highwire/filestream/77077/field_highwire_adjunct_files/1/190777-guide-2-at.pdf)
Supplement: 190777-guide-2-at.pdf [file 190777-guide-2-at.pdf]

## **Appendix 2 (as supplied by the authors): Team Composition**

### **Steering Committee**

- Kevin Pottie (Chair)
- Claire Kendall
- Tim Aubry
- Anne Andermann
- Ginetta Salvalaggio
- Gary Bloch
- David Ponka
- Eric Agbata
- Vanessa Brcic
- Vicky Stergiopoulos
- Peter Tugwell

### **Community Scholars**

- Dawnmarie Harriot
- Terry Hannigan
- Christine Lalonde

Two other members did not provide written consent to be listed.

### **Technical Team Leads**

- Olivia Magwood
- Ammar Saad
- Oreen Mendonca
- Christine Mathew
- Sebastian Mott
- Harneel Kaur
- Jean Wang
- Annie Sun
- Victoire Kpade
- Tasnim Abdalla

### **Guideline Panel Members**

1. Chantal Batt: Administrator, Aboriginal Human Resource Council, Ottawa, ON;
2. Susan Crouse: Family Physician, Horizon Clinic, Moncton, NB;
3. Amanda DiFalco: Program Manager, Hamilton Homelessness Program, ON;
4. Jino Distasio: Research Director, University of Winnipeg, MB;
5. Jamie Gillies: Medical Student, Canadian Federation for Medical Students, University of Manitoba, MB;
6. Dale Guenter: Family Physician, Shelter Health Network Hamilton and McMaster University, ON;
7. Syeda Shanza Hashmi: Medical Student, Canadian Federation of Medical Students, Ottawa, ON;

8. Tim Holland, Family Physician, Dalhousie University, NS;
9. Stephen Hwang: Internist, St. Michael's Hospital, Toronto, ON;
10. Matthew To: Medical Resident, St. Michael's Hospital, Toronto, ON;
11. Heather Manson: Chief of Health Promotion, Chronic Disease and Injury Prevention , Public Health Ontario, Toronto, University of Toronto, ON;
12. Thomas Piggott: Department of Health Research Methods, Evidence, and Impact, McMaster University, Hamilton, ON;
13. Rachel Rodin: Scientific Director and Senior Medical Advisor, PHAC, Toronto, ON;
14. David L. Streiner, Clinical psychologist, McMaster University, Hamilton, ON;
15. Christy Sutherland: Family Physician, Portland Hotel Society, Vancouver, BC;
16. Jeffrey Turnbull: Internist, The Ottawa Hospital, Ottawa ON;
17. Shanell Twan: Outreach worker & Community Liaison at Inner City Health & Wellness Program, Streetworks Edmonton; AB;
